## Correspondence

## School Students as *Drosophila* Experimenters

**Faiza Siyad, Jodianne Griffiths, Faira Janjua, Elizabeth Jackson, Ian Rodrigues, Fiona Kerr, Daniel Mackay, Simon Lovestone**

Students can be a valuable resource for the scientific community, as demonstrated by Chen et al. [1]. However, it is not just undergraduate students who can contribute but secondary school students also. Previously some of us have published a *Drosophila* model of tauopathy where we have shown that overexpression of tau results in disruption of axonal transport and an intact phenotype in both larvae and adults [2]. This phenotype is tau phosphorylation dependant and attenuated by inhibitors of Glycogen synthase kinase-3 (GSK-3). We have thought for some time that this model is ideally suited for testing compounds that might alter axonal transport or affect signalling through GSK-3 and other kinases to tau phosphorylation. However, we had other priorities in the laboratory and this work was not pursued.

The article by Chen et al. [1] coincided with planning for an open day as part of the British Association for Advancement of Science's Science Week in March 2005 and funded by the Medical Research Council as part of a Public Engagement with Science activity. As a consequence we established a collaboration between three local schools and the Institute of Psychiatry at King's College London, and students worked alongside research workers to test a series of compounds on a larval phenotype and the neuromuscular junction (NMJ) anatomy of wild-type flies (Oregon R) and transgenic flies (human 3R tau expressed in motor neurons).

We have replicated the previous observation that tau expression significantly alters motor-dependant phenotypes and in addition that the NMJ is severely disrupted. We have tested a series of compounds that alter signalling to GSK-3, and with one exception these all alter the phenotype in the predicted direction—where inhibition of GSK-3 improves the phenotype. We also tested curcumin, which has previously been shown to alter A $\beta$  aggregation and amyloid-dependant processes [3]. We found no effect of curcumin in our tau-dependant model. Most interestingly, we found a large and very highly significant worsening of the phenotype with taxol-treated larvae, in contrast to previous studies [4].

We, the students, believe that it was worthwhile doing the experiment as it could lead to greater understanding of Alzheimer disease, and we have found that the experience has helped some of us in our commitment to pursue a career in science and medicine.

We, the scientists, have completed a pilot experiment involving multiple data points processed rapidly and using a widely available resource—students. Twelve pairs of hands allowed us to gather in a little over a day data that would have otherwise required some weeks of research time. We are now in the process of replicating and validating the student data, concentrating on those compounds that appear most effective from the student-led experiment. We are grateful to Chen et al. [1] for directing us to this valuable human resource. ■

### Acknowledgments

Other students taking part in the study included Nadia Adesoji, Faiza Ahmad, Saira Siddiqui, Alice Cottington, Vanessa Christophers, and from Graveney School in London Alasdair MacDonald, Ashley Lawrence, Simon Perrineau, and Sidra Tulmuntaha.

Faiza Siyad

Jodianne Griffiths

John Ruskin College  
Croydon, United Kingdom

Faira Janjua

Burntwood School  
London, United Kingdom

Elizabeth Jackson

Ian Rodrigues

Fiona Kerr

Daniel Mackay

Simon Lovestone (E-mail: [s.lovestone@iop.kcl.ac.uk](mailto:s.lovestone@iop.kcl.ac.uk))

King's College London  
London, United Kingdom

### References

1. Chen J, Call GB, Beyer E, Bui C, Cespedes A, et al. (2005) Discovery-based science education: Functional genomic dissection in *Drosophila* by undergraduate researchers. *PLoS Biol* 3: e59.
2. Mudher A, Shepherd D, Newman TA, Mildren P, Jukes JP, et al. (2004) GSK-3 $\beta$  inhibition reverses axonal transport defects and behavioural phenotypes in *Drosophila*. *Mol Psychiatry* 9: 522–530.
3. Ono K, Hasegawa K, Naiki H, Yamada M (2004) Curcumin has potent anti-amyloidogenic effects for Alzheimer's beta-amyloid fibrils in vitro. *J Neurosci Res* 75: 742–750.
4. Zhang B, Maiti A, Shively S, Lakhani F, McDonald-Jones G, et al. (2005) Microtubule-binding drugs offset tau sequestration by stabilizing microtubules and reversing fast axonal transport deficits in a tauopathy model. *Proc Natl Acad Sci U S A* 102: 227–231.

**Citation:** Siyad F, Griffiths J, Janjua F, Jackson E, Rodrigues I, et al. (2005) School students as *Drosophila* experimenters. *PLoS Biol* 3(7): e246.

**Copyright:** © 2005 Siyad et al. This is an open-access article distributed under the terms of the Creative Commons Attribution License, which permits unrestricted use, distribution, and reproduction in any medium, provided the original work is properly cited.

**DOI:** 10.1371/journal.pbio.0030246
